# Supplementary material for: Conversion of Industrial Sludge into Activated Biochar for Effective Cationic Dye Removal: Characterization and Adsorption Properties Assessment
Source: MDPI journal article supplement (doi:10.3390/w14142206), 2022-07-13
Supplement: s1 [file s1]

## Article

# Conversion of Industrial Sludge into Activated Biochar for Effective Cationic Dye Removal: Characterization and Adsorption Properties Assessment

Salah Jellali <sup>1,\*</sup>, Ahmed Amine Azzaz <sup>2</sup>, Majida Al-Harrasi <sup>1</sup>, Yassine Charabi <sup>3</sup>, Jamal Nasser Al-Sabahi <sup>4</sup>, Ahmed Al-Raeesi <sup>1</sup>, Muhammad Usman <sup>5</sup>, Noura Al Nasiri <sup>1</sup>, Mohammed Al-Abri <sup>6,7</sup> and Mejdi Jeguirim <sup>8,\*</sup>

<sup>1</sup> Centre for Environmental Studies and Research, Sultan Qaboos University, Al-Khoud 123, Oman; s.jelali@squ.edu.om (S.J.); mageda502@gmail.com (M.A.-H.); aalraeesi@squ.edu.om (A.A.-R.); noura@squ.edu.om (N.A.-N.)

<sup>2</sup> EDYTEM (UMR5204), CNRS, Université Savoie Mont-Blanc, F-73000 Chambéry, France; ahmed-amine.azzaz@univ-smb.fr

<sup>3</sup> Department of Geography, College of Arts and Social Sciences, Sultan Qaboos University, Al-Khoud 123, Oman; yassine@squ.edu.om

<sup>4</sup> College of Agriculture and Marine Sciences, Sultan Qaboos University, Al-Khoud 123, Oman; jamal@squ.edu.om

<sup>5</sup> PEIE Research Chair for the Development of Industrial Estates and Free Zones, Center for Environmental Studies and Research, Sultan Qaboos University, Al-Khoud 123, Oman; muhammad.usman@squ.edu.om

<sup>6</sup> Nanotechnology Research Centre, Sultan Qaboos University, Al-Khoud 123, Oman, alabri@squ.edu.om

<sup>7</sup> College of Engineering, Sultan Qaboos University, Al-Khoud 123, Oman

<sup>8</sup> The Institute of Materials Science of Mulhouse (IS2M), CNRS, University of Haute Alsace, UMR 7361, F-68100 Mulhouse, France

\* Correspondence: s.jelali@squ.edu.om (S.J.); mejdi.jeguirim@uha.fr (M.J.)

## Supplementary materials

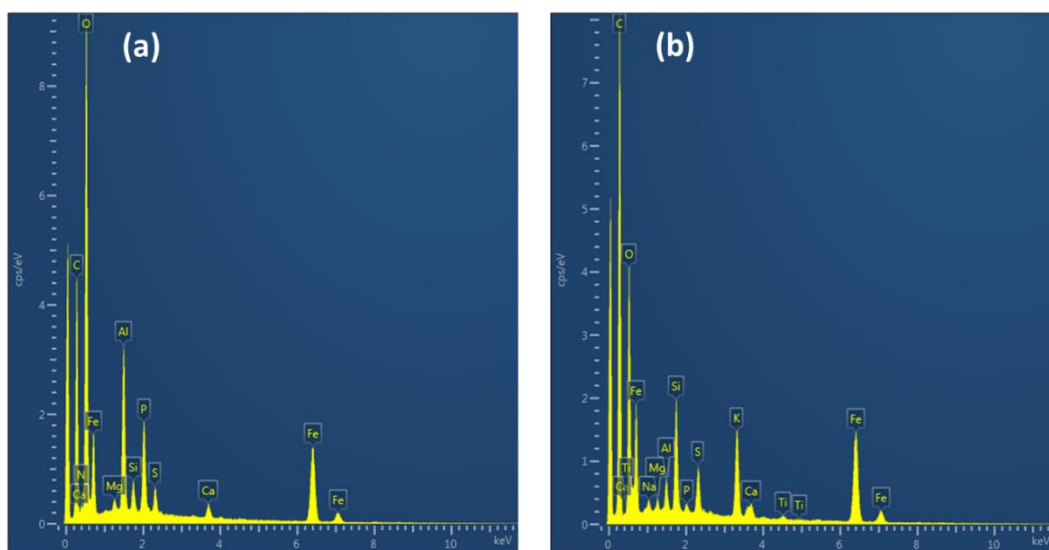

Figure S1. EDX specters of (a) IS-R and (b) IS-B-KOH.

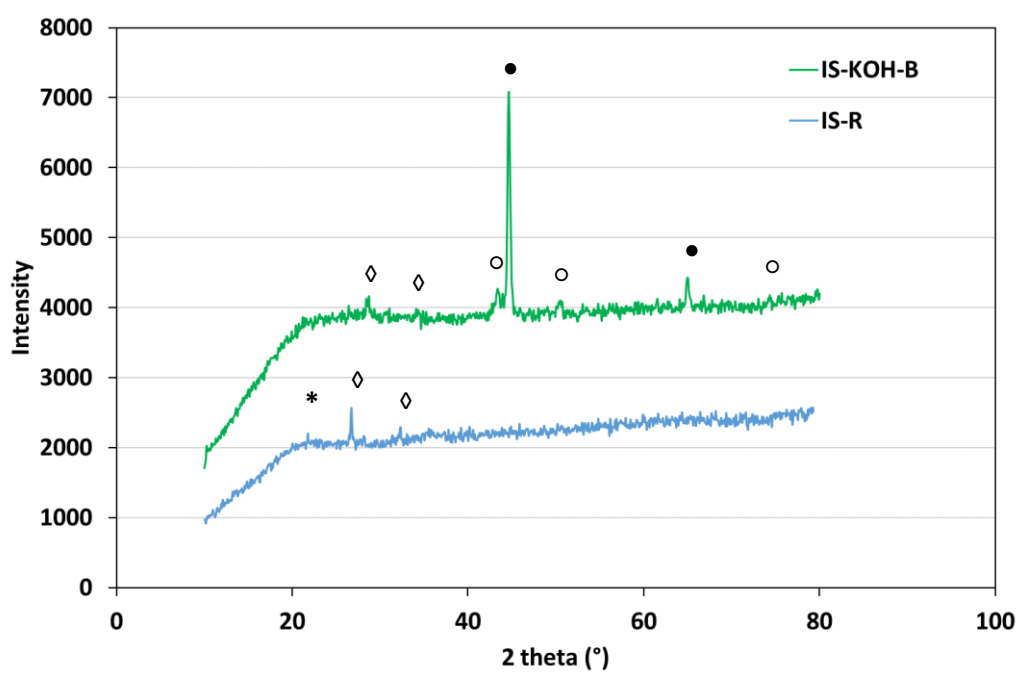

Figure S2. XRD diffractograms for IS-R and IS-KOH-B before and after MB adsorption (\*: Cellulose I, ◇: SiO<sub>2</sub>, ○: Fe<sub>3</sub>C, ●: Fe,Ni).

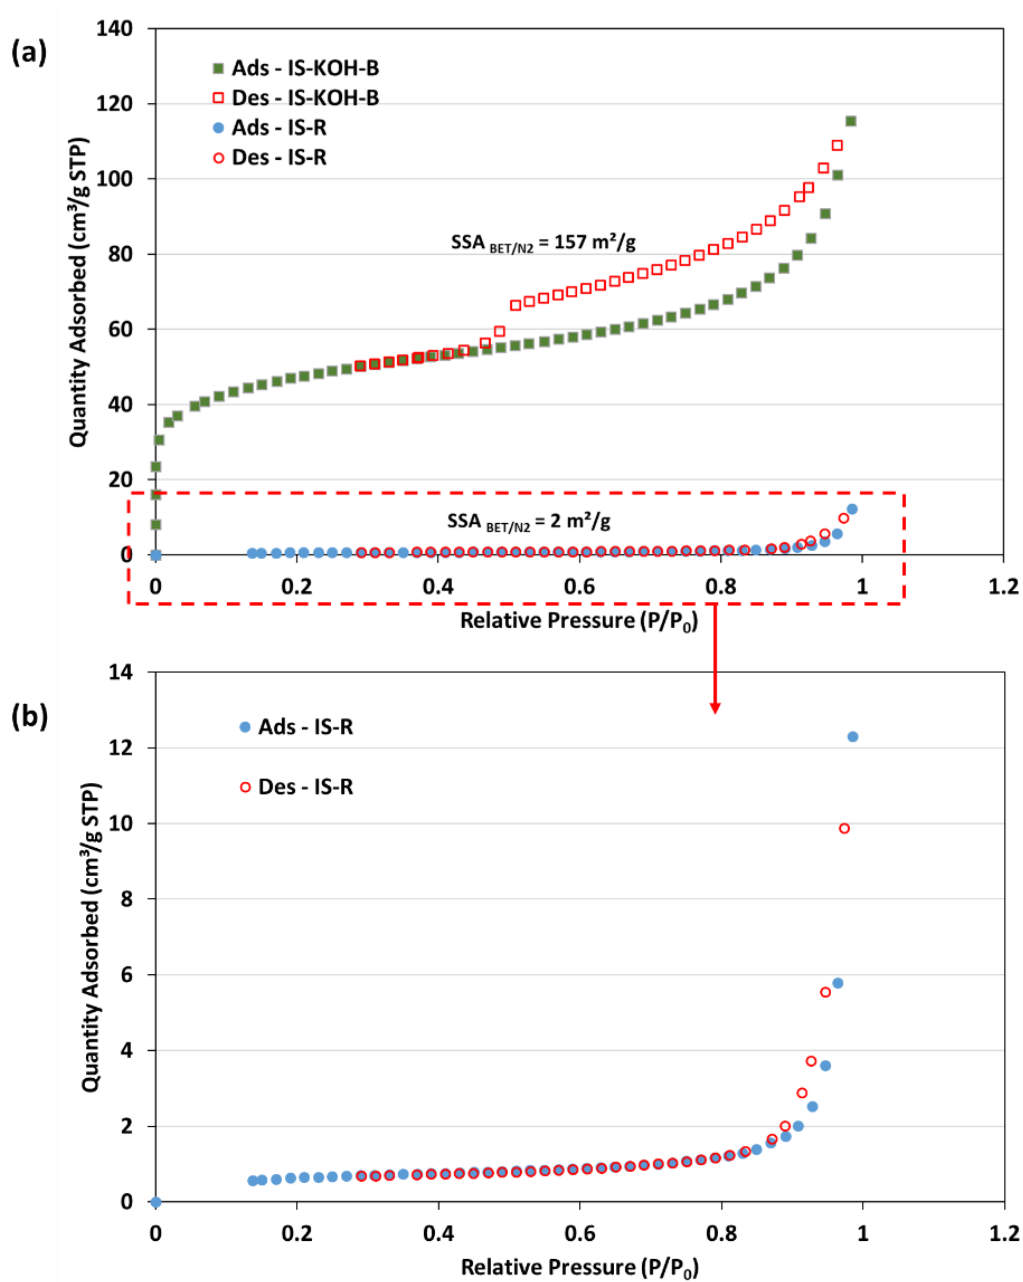

**Figure S3.** N<sub>2</sub> Adsorption/desorption isotherm (77K) for (a) IS-KOH-B and IS-R and (b) a detailed IS-R isotherm.
